# Supplementary figures and images for: Machine Learning Assisted Classification of Cell Lines and Cell States on Quantitative Phase Images
Source: MDPI journal article supplement (doi:10.3390/cells10102587), 2021-09-29

HeLa live cells

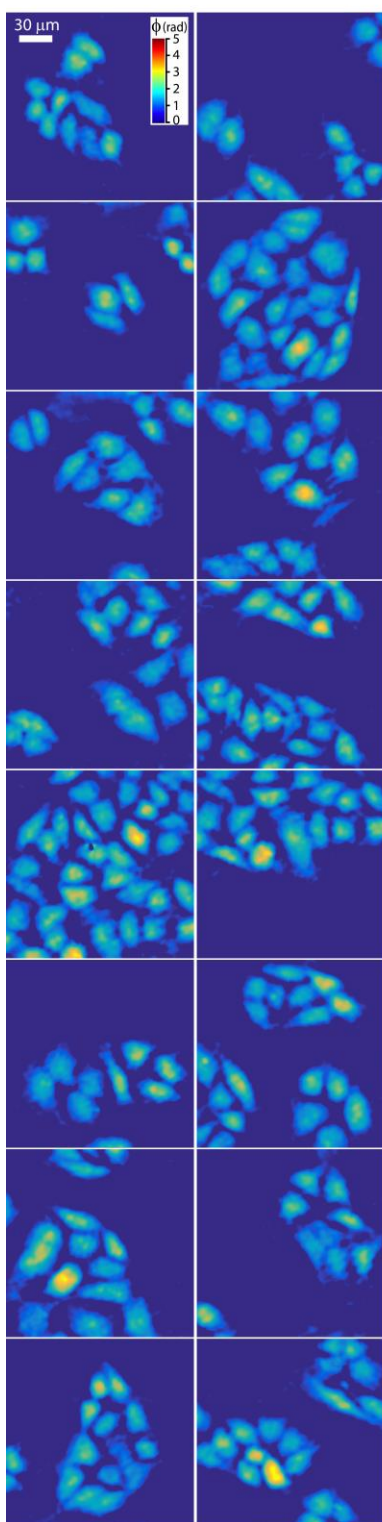

A549 live cells

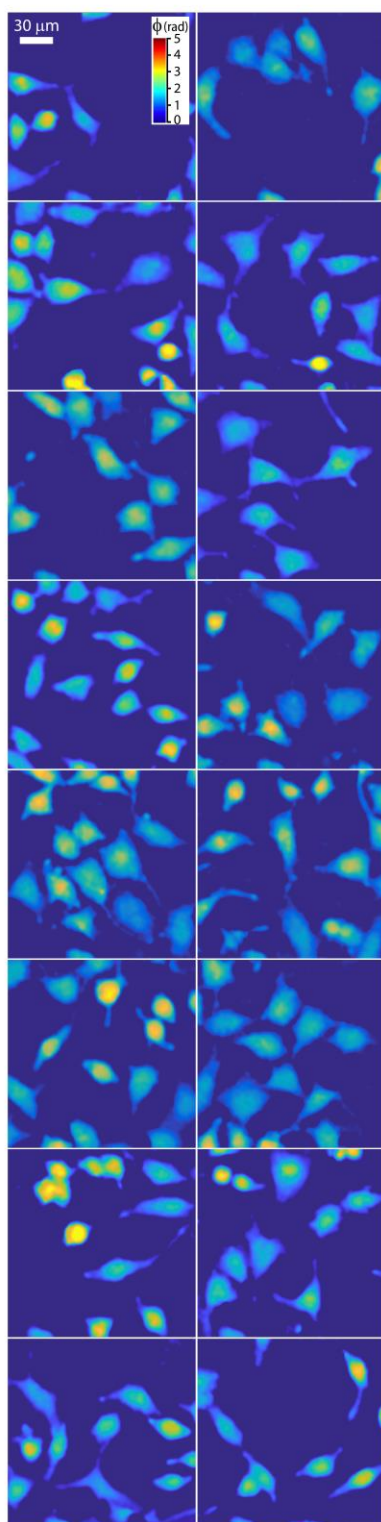

3T3 live cells

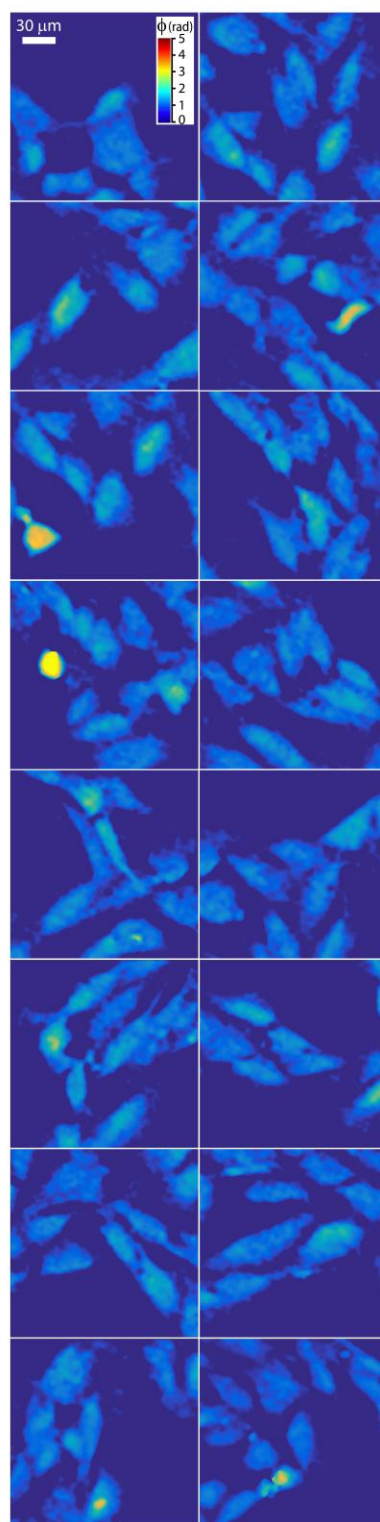

Supplement: s1 [file s1]
